# Supplementary material for: Prevalence and Time-Course of Diaphragmatic Dysfunction Following Lung Resection: A Repeated Ultrasonic Assessment
Source: Research Square preprint supplement (doi:10.21203/rs.3.rs-629063/v1), 2021-06-21
Supplement: Supplementary file 1 [file 2fe182169539b36c40ec08fc.pdf]

**Table 2. Association between persistent (Day 0 and Day 3) Diaphragmatic Dysfunction on the operated side and development of postoperative pulmonary and cardiac complications according to logistic regression analysis**

| Outcome                                   | Persistent DD<br>N=23 (46%) | No Persistent DD<br>N=27 (54%) | Univariate Analysis |       | Multivariate Analysis after step AIC procedure |       |
|-------------------------------------------|-----------------------------|--------------------------------|---------------------|-------|------------------------------------------------|-------|
|                                           |                             |                                | OR (95% CI)         | P     | OR (95% CI)                                    | P     |
| All respiratory complications             | 8 (40%)                     | 7 (24%)                        | 2.10 (0.61-7.41)    | 0.24  | -                                              | -     |
| Lung infection or COPD exacerbation       | 8 (40%)                     | 2 (7%)                         | 9.00 (1.92-65.93)   | 0.01  | 2.27 (0.32-20.07)                              | 0.418 |
| Pneumothorax                              | 1 (5%)                      | 2 (7%)                         | 0.46 (0.02-3.88)    | 0.51  | -                                              | -     |
| Need for Non-Invasive Ventilation         | 0 (0%)                      | 3 (10%)                        | -                   | -     | -                                              | -     |
| Need for Invasive Ventilation             | 2 (10%)                     | 1 (3%)                         | 3.11 (0.28-69.88)   | 0.37  | -                                              | -     |
| Ventilation duration (days)               | 0 (0;0)                     | 0 (0;0)                        | 1.08 (0.98-1.38)    | 0.31  | -                                              | -     |
| Duration before chest tube removal (days) | 7 (4;11)                    | 5 (4;6)                        | 1.12 (0.99-1.30)    | 0.09  | 0.89 (0.69-1.11)                               | 0.33  |
| All cardiac complications                 | 4 (20%)                     | 5 (17%)                        | 1.20 (0.26-5.22)    | 0.81  | -                                              | -     |
| Wound infection                           | 1 (5%)                      | 1 (3%)                         | 1.47 (0.06-38.82)   | 0.79  | -                                              | -     |
| Hospital length of stay (days)            | 20 (15;23)                  | 9 (7;12)                       | 1.21 (1.09-1.38)    | 0.001 | 1.30 (1.08-1.69)                               | 0.016 |
| Need for ICU admission                    | 9 (45%)                     | 1 (3%)                         | 3.93 (1.10-15.53)   | 0.04  | 1.02 (0.14-6.03)                               | 0.98  |

Data are expressed in number (N) and percentages (%) unless otherwise indicated. *P* value for univariate or multivariate analysis. DD: Diaphragmatic Dysfunction; Persistent DD: DD present on the operated side only at D0 persisting at D3; All respiratory complications: lung or wound infection, COPD exacerbation, pleural effusion, pneumothorax, need for invasive or non-invasive ventilation; COPD: Chronic Obstructive Pulmonary Disease; All cardiac complications: rhythm disturbances, atrial fibrillation, pulmonary edema or myocardial ischemia; ICU: Intensive Care Unit, OR: Odds Ratio.
